# 1 **A multiscale characterization of cortical shape asymmetries** 2 **in early psychosis**

3 Yu-Chi Chen<sup>1,2,3,4\*</sup>, Jeggan Tiego<sup>1,2</sup>, Ashlea Segal<sup>1,2</sup>, Sidhant Chopra<sup>1,2,5</sup>, Alexander Holmes<sup>1,2</sup>,  
4 Chao Suo<sup>1,2</sup>, James C. Pang<sup>1,2†</sup>, Alex Fornito<sup>1,2†</sup>, Kevin M. Aquino<sup>1,2,6,7,8†</sup>

5

6 †These authors contributed equally to this work.

7

8 <sup>1</sup>Turner Institute for Brain and Mental Health, School of Psychological Sciences, Monash  
9 University, Victoria, Australia 3800.

10 <sup>2</sup>Monash Biomedical Imaging, Monash University, Victoria, Australia 3800.

11 <sup>3</sup>Monash Data Futures Institute, Monash University, Victoria, Australia 3800.

12 <sup>4</sup>Brain and Mind Centre, University of Sydney, New South Wales, Australia 2050.

13 <sup>5</sup>Department of Psychology, Yale University, Connecticut, USA, 06511.

14 <sup>6</sup>School of Physics, University of Sydney, New South Wales, Australia 2006.

15 <sup>7</sup>Center of Excellence for Integrative Brain Function, University of Sydney, Australia 2006.

16 <sup>8</sup>BrainKey Inc., California, USA, 94103.

17

18 \*Correspondence to:

19 Yu-Chi Chen

20 Brain and Mind Centre, University of Sydney

21 100 Mallett Street, New South Wales, 2050, Australia

22 E-mail: [yu-chi.chen@sydney.edu.au](mailto:yu-chi.chen@sydney.edu.au)

23

24 Keywords: Psychosis, Shape Analysis, Structural MRI, Cortex, Brain Asymmetry, Multiscale

25 **Highlights**

- 26 • Cortical shape asymmetries are more sensitive than other cortical asymmetry measures,  
27 such as cortical thickness, surface area and gyrification, in capturing abnormalities in  
28 patients with early psychosis.
- 29 • The abnormalities in cortical shape asymmetry are expressed at coarse spatial scales and  
30 are correlated with excitement and emotional distress symptoms.

31 **ABSTRACT**

32 **Background:** Psychosis has often been linked to abnormal cortical asymmetry, but prior results  
33 have been inconsistent. Here, we applied a novel spectral shape analysis to characterize cortical  
34 shape asymmetries in patients with early psychosis across different spatial scales.

35 **Methods:** We used the Human Connectome Project for Early Psychosis dataset (aged 16–35),  
36 including 56 healthy controls (male = 37, female = 19) and 112 patients with early psychosis (male  
37 = 68, female = 44). We quantified shape variations of each hemisphere over different spatial  
38 frequencies and applied a generalized linear model to compare differences between healthy control  
39 participants and patients with early psychosis. We further used a canonical correlation analysis  
40 (CCA) to examine associations between shape asymmetries and clinical symptoms.

41 **Results:** Cortical shape asymmetries, spanning wavelengths between about 22 mm and 75 mm,  
42 were significantly different between healthy control participants and patients with early psychosis  
43 (Cohen's  $d = 0.28$ – $0.51$ ), with patients showing greater asymmetry in cortical shape than controls.  
44 A single canonical mode linked the asymmetry measures to symptoms (CCA  $r = 0.45$ ), such that  
45 higher cortical asymmetry was correlated with more severe excitement symptoms and less severe

46 emotional distress. In contrast, significant group differences in morphological asymmetries of  
47 cortical thickness, surface area, and gyrification at either global or regional levels were not  
48 identified.

49 **Conclusions:** Cortical shape asymmetries are more sensitive than other morphological  
50 asymmetries in capturing abnormalities in patients with early psychosis. These abnormalities are  
51 expressed at coarse spatial scales and are correlated with specific symptom domains.

## 52 **1. Introduction**

53 Relative to other primates, the human cerebral cortex shows a greater degree of anatomical and  
54 functional asymmetry between the left and right hemispheres and greater inter-individual  
55 variability in this asymmetry (1-3). Accordingly, hemispheric asymmetries have been implicated  
56 in the evolution of human-specific cognition and behavior (4, 5). Conversely, abnormal  
57 hemispheric lateralization has been linked to psychosis (6-8), with some proposing that it is linked  
58 to the unique expression of this syndrome in humans (9). However, reported links between  
59 abnormal asymmetry and psychosis have not been consistently replicated (7, 10-14).

60 Brain asymmetries are commonly considered on a population basis by mapping average  
61 asymmetry levels across a group of individuals (4, 11, 15-17), which is also referred to as  
62 directional asymmetry (2, 18). For instance, the left planum temporale, encompassing Wernicke's  
63 area, is substantially larger, on average, than its right-hemisphere counterpart in healthy control  
64 (HC) participants (5). Interestingly, patients with schizophrenia and their relatives show reduced  
65 asymmetry in planum temporale compared to HCs (8, 19, 20). However, population-based studies  
66 are not entirely informative as cortical asymmetry is highly variable between individuals (2, 3, 18,  
67 21, 22), with many people showing little or even reversed asymmetries relative to the population  
68 average (2, 3, 18, 23). Individual deviations of asymmetry from the population mean are referred  
69 to as fluctuating asymmetries and may be driven by environmental stress, developmental  
70 instability/plasticity, or individual-specific genetic perturbations (18, 22, 24-27). Studies of  
71 fluctuating asymmetries in psychosis are scarce, but a study by Núñez et al. (28) has shown that  
72 such asymmetries in cortical shape at the global level are increased in patients with schizophrenia  
73 and are associated with negative symptoms.

74 One factor that complicates the identification of reliable asymmetry phenotypes in  
75 psychosis is that most analyses to date have focused either on defined regions-of-interest (ROI) or  
76 have relied on point-wise (e.g., voxel-based) analyses, which only consider asymmetries at certain  
77 spatial resolution scales (19, 20, 29, 30). However, cortical asymmetries can be identified at  
78 multiple scales, ranging from entire hemispheres (e.g., Yakolevian torque (31)) to more fine-scale  
79 sulcal and gyral features (32). Whether abnormal asymmetries in psychosis are expressed at certain  
80 specific scales or are a multiscale phenomenon remains unclear. Moreover, most anatomical  
81 asymmetry studies use size-related measures, such as volume, cortical thickness, and surface area,  
82 which often conflate individual differences in size and shape and have limited sensitivity for  
83 capturing individually unique properties of brain anatomy (21, 33).

84 We have recently shown that multiscale spectral descriptions of asymmetries in cortical  
85 shape, rather than size, are highly personalized, akin to a cortical fingerprint, and can identify  
86 subjects more accurately than common morphological measures (e.g., volume, cortical thickness,  
87 and surface area), measures of inter-regional functional coupling, and the cortical shapes of  
88 individual hemispheres (21). Mathematically, these spectral shape descriptions are obtained  
89 through eigen-decomposition of the Laplace-Beltrami Operator (LBO) of the cortical surface (21,  
90 34, 35). The resulting eigenfunctions correspond to an orthogonal basis set of spatial patterns of  
91 different spatial frequencies that capture the geometry of the cortex, and the eigenvalues represent  
92 their spatial frequencies (see Methods) (33-35). Analysis of these spatial eigenfunctions is  
93 ubiquitous in many branches of physics, engineering, and biology (33-35) and naturally captures  
94 geometric properties from the coarse scale (low-order eigenfunctions) to the fine scale (high-order  
95 eigenfunctions) forming a multiscale description of geometry (21, 34). This multiscale description  
96 departs from conventional methods focusing on specific regions or global hemispheric differences

97 (10, 15, 19, 20, 30, 36, 37). Our previous work has shown that optimal subject identifiability of  
98 cortical shape asymmetry occurs at coarse spatial scales, corresponding to wavelengths larger than  
99 about 37 mm. We also found that these coarse scale asymmetries are correlated with individual  
100 differences in general cognitive function and that they are largely driven by unique environmental,  
101 rather than genetic, factors (21). Together, these findings suggest that spectral shape analysis of  
102 cortical asymmetries offers a window into understanding highly personalized features of brain  
103 anatomy.

104 Here, we applied spectral shape analysis to investigate cortical asymmetries in patients  
105 with early psychosis (EP), who were within five years of the initial psychosis onset. EP is a key  
106 period to understand brain changes associated with the development of psychosis that is less  
107 confounded by prolonged treatment exposure (38). Prior works have shown abnormal cortical  
108 asymmetry in patients with psychosis (19, 20, 28, 29, 36), and cortical shape asymmetry at coarse  
109 spatial scales captures the most individualized and robust information (21). Thus, we aim to  
110 examine the scale-specific cortical shape asymmetry on EP patients and HCs. Moreover, the  
111 multiscale shape descriptions isolate scale-specific and shape-specific effects that traditional  
112 methods cannot identify. We further compared the cortical shape asymmetry with asymmetries  
113 based on cortical thickness, surface area, and local gyrification index (LGI). Finally, we explored  
114 the relationships between cortical shape asymmetry and different psychotic symptoms.

115

## 116 **2. Methods**

### 117 *2.1. Neuroimaging data*

#### 118 *2.1.1. Human Connectome Project for Early Psychosis (HCP-EP)*

119 We used open-source data from the Human Connectome Project for Early Psychosis (HCP-EP;  
120 <https://www.humanconnectome.org/study/human-connectome-project-for-early-psychosis>; (38)),  
121 which includes 169 subjects with preprocessed structural MRI data. We excluded data for one  
122 individual who showed eigen-groups of matched asymmetry signature (MAS) values that were  
123 more than three standard deviations below the sample mean. The remaining 168 participants  
124 include 112 patients with early psychosis (EP; aged 16–34, mean = 23.26, standard deviation =  
125 3.67; male = 68, female = 44) and 56 healthy controls (HCs; aged 16–35, mean = 24.10, standard  
126 deviation = 4.47; male = 37, female = 19). For EP patients, the Chlorpromazine Equivalence (CPZ)  
127 of current antipsychotic drug was between 0 to 1000 mg/d (mean = 165 mg/d), and the exposure  
128 time to antipsychotic medication was between 0 to 56 months (mean = 14.3). The patients were  
129 diagnosed with non-affective (n = 80) and affective (n = 32) psychosis and were all within five  
130 years of the initial onset of their psychotic symptoms. The criteria for non-affective psychotic  
131 disorders in this study are the diagnosis of schizophrenia, schizophreniform, schizoaffective,  
132 delusional disorder, psychotic disorder not otherwise specified, and brief psychotic disorder  
133 according to the Diagnostic and Statistical Manual of Mental Disorders, Fifth Edition (DSM-V).  
134 The criteria for affective psychotic disorders is the DSM-V diagnosis of major depressive disorder  
135 with psychosis or bipolar disorder with psychosis (38). Please see Table S1., (38) and  
136 [https://www.humanconnectome.org/storage/app/media/documentation/HCP-EP1.1/HCP-](https://www.humanconnectome.org/storage/app/media/documentation/HCP-EP1.1/HCP-EP_Release_1.1_Manual.pdf)  
137 [EP\\_Release\\_1.1\\_Manual.pdf](https://www.humanconnectome.org/storage/app/media/documentation/HCP-EP1.1/HCP-EP_Release_1.1_Manual.pdf) for more details.

### 138 *2.1.2. Image acquisition and processing*

139 Imaging data were collected on three Siemens MAGNETOM Prisma 3T scanners, with 32-channel  
140 head coils at Indiana University and Brigham and Women’s Hospital, and a 64-channel head and

141 neck coil at McLean, but the neck channels were turned off  
142 ([https://www.humanconnectome.org/storage/app/media/documentation/HCP-EP1.1/HCP-EP\\_Release\\_1.1\\_Manual.pdf](https://www.humanconnectome.org/storage/app/media/documentation/HCP-EP1.1/HCP-EP_Release_1.1_Manual.pdf)). Special procedures and analyses had been taken to ensure the  
143 homogeneity of the image quality across both sites (38). The Connectome Coordinating Facility  
144 at Washington University provides image processing, central quality control, and data coordination  
145 services for all the HCP-style datasets (39). The HCP-EP datasets underwent the same protocol as  
146 the HCP lifespan dataset (39). In brief, the T1-weighted structural MRI scans applied a multi-echo  
147 MPRAGE sequence with a high isotropic resolution (0.8 mm; other parameters include T1 1000  
148 ms, TR 2400 ms, and 208 slices; see (39) and <https://www.humanconnectome.org/study/hcp-lifespan-aging/project-protocol/imaging-protocols-hcp-aging> for details). The HCP-EP dataset  
149 included cortical surface meshes created by the FreeSurfer-HCP pipeline (40-43), which is based  
150 on FreeSurfer version 6.0 (41) with HCP-specific enhancements (40), from T1-weighted MRI  
151 images. The cortical surface mesh was further downsampled and registered on the fsLR-32k  
152 template, with 32,492 vertices on each hemisphere of the cortex (44). The fsLR-32k template  
153 provides an accurate cortical shape of the standard Montreal Neurological Institute (MNI) template  
154 (40) but is less computational demanding than the native MNI surface mesh model, and thus the  
155 space of the fsLR-32k template is recommended when analyzing the data at the vertex level (40).  
156 We used the registered images provided by the HCP-EP dataset without further corrections or  
157 smoothing.

### 160 *2.1.3. Clinical and medication assessment*

161 The HCP-EP dataset provided the severity of psychotic symptoms of EP patients measured by the  
162 Positive and Negative Syndrome Scale (PANSS (45)). We followed van der Gaag et al. (46) to



163 employ a five-factor model that has been widely used for evaluating psychotic symptoms (47-52).  
164 The five-factor model is more robust and clinically relevant than the original three-factor model  
165 (46, 50, 52). The five-factor model comprises the following dimensions: positive symptoms,  
166 negative symptoms, disorganization symptoms, excitement, and emotional distress, and was  
167 constructed by ten-fold cross-validation with more than 5000 subjects (46). We used factor  
168 analysis with maximum likelihood estimation and oblique rotation (53, 54) as implemented in (55,  
169 56) to extract the five factors from the items that had occurred across all folds of the cross-  
170 validation in van der Gaag et al. (46). To confirm the robustness of our results, we also tested the  
171 five-factor model using the items selected by a recent meta-analysis (57), yielding similar results  
172 (please see Table S2 for the items of each factor).

173 HCP datasets provided lifetime exposure duration of antipsychotic drugs and CPZ of  
174 current antipsychotic drugs. Both measures were uncorrelated with the MAS eigen-groups in EP  
175 patients ( $P_{FDR} > 0.8$  and uncorrected  $P$ -values all  $> 0.5$ ), suggesting that medication has a limited  
176 influence on cortical shape asymmetries.

## 177 2.2. Spectral shape analysis

178 To obtain a multiscale shape description of the left and right cortical surface meshes obtained from  
179 FreeSurfer, we solved the eigenfunction-eigenvalue problem of the Laplace-Beltrami operator  
180 (LBO), which is given by (33-35):

$$181 \quad \Delta f = -\lambda f \quad (1)$$

182 where  $\Delta$  is the LBO and  $f$  is a distinct eigenfunction with corresponding eigenvalue  $\lambda$ . The  
183 eigenfunctions are orthogonal and describe shape variations at different spatial wavelengths,  
184 ordered from coarse-grained (the second eigenfunction in Fig. 1A) to fine-grained scales (e.g., the

185 500<sup>th</sup> eigenfunction in Fig. 1A) (34, 35, 58-60). The eigenvalues form a sequence that ranges from  
186 zero to infinity, i.e.,  $0 \leq \lambda^1 \leq \lambda^2 \leq \dots < \infty$ , and each eigenvalue is analogous to the wave frequency  
187 of sinusoids in Fourier analysis (21, 34, 35). The family of eigenfunctions thus represents an  
188 orthogonal basis set that can be used to fully decompose and reconstruct the shape of each cortical  
189 hemisphere (35). An intuitive example of the LBO eigenvalues and eigenfunctions is percussion a  
190 drum: eigenvalues are analogous to the vibration frequency of the drum membrane, and the  
191 eigenfunctions are the corresponding vibration patterns of the drum membrane (59).

192 We utilized the Shape-DNA software package (33-35) to perform an eigendecomposition  
193 of the cortical surface mesh of each hemisphere of an individual (40-43). Shape-DNA uses the  
194 cubic finite element method to solve and optimize the eigenfunction/eigenvalue problem of the  
195 LBO based on the intrinsic shape of an object or cortex (34, 35). Shape-DNA outperforms other  
196 shape analysis methods for retrieving object shapes (61) and has been applied to characterize brain  
197 shapes with superior subject identifiability than other conventional measures (21, 33) such as  
198 cortical volume, thickness, gyrification, and inter-regional functional coupling (62).

### 199 2.3. *Matched asymmetry signature (MAS)*

200 In our previous work, we directly calculated the differences between the LBO eigenvalue spectra  
201 of the left and right hemispheres to characterize the fluctuating asymmetry of cortical shape across  
202 a spectrum of spatial scales, also called the shape asymmetry signature (SAS) (21). The SAS is  
203 very sensitive for quantifying individualized shape asymmetry features (21) but is too  
204 individualized to facilitate group comparisons, as the spatial patterns defined by higher-frequency  
205 eigenfunctions are often highly divergent to allow simple pooling across individuals. We therefore  
206 developed a new spectral approach for quantifying cortical shape asymmetry that is more suitable

207 for group comparisons and more accurately accounts for hemispheric differences in the spatial  
208 patterning of shape variations. Instead of using the eigenvalues, we calculated the product-moment  
209 correlation between the left and right eigenfunctions to characterize the divergence of the two  
210 hemispheres in each individual.

211 A critical challenge in this regard is that there is no guarantee that the eigenfunctions of the  
212 left and right hemispheres are directly comparable. As shown in Fig. 1B, eigenfunctions of the left  
213 and right hemispheres do not necessarily overlap at the same index (i.e., the maximum correlation  
214 may occur at different indices); in this particular individual, the 11<sup>th</sup> eigenfunction of the left cortex  
215 is more similar to the 12<sup>th</sup> eigenfunction ( $r = 0.96$ ) of the right cortex than the 11<sup>th</sup> right  
216 eigenfunction ( $r = 0.17$ ) (Fig. 1B, left panel). This occurs because subtle variations in the shape of  
217 the left and right cortices can alter the ordering of eigenfunctions, and sometimes result in quite  
218 distinct eigenfunctions at higher spatial frequencies. Although the difference in the ordering of the  
219 left and right eigenfunctions reflects individual shape variations, this divergence makes it difficult  
220 to compare eigenfunctions across individuals. In this study, after obtaining 500 eigenfunctions for  
221 each hemisphere of each individual (Fig. 1A), we first estimated correlations between the spatial  
222 pattern of each pair of left-right eigenfunctions, resulting in a symmetric  $500 \times 500$  matrix of  
223 correlations quantifying the similarity between left and right eigenfunctions across spatial scales  
224 (e.g., Fig. 1C, left panel). The maximum absolute values of correlations observed across the rows  
225 of this matrix (or equivalently, columns) quantify the similarity between optimally-matched  
226 eigenfunctions of the left and right hemispheres at each of the 500 spatial scales considered in the  
227 decomposition (e.g., Fig. 1C, right panel). The resulting vector of 500 maximum correlations thus  
228 provides a multiscale, individualized description of cortical shape asymmetries, which we term the  
229 Matched Asymmetry Signature (MAS), with lower MAS values corresponding to higher shape

230 asymmetry. We take the absolute value of the correlation because the sign of a given eigenfunction  
 231 is arbitrary.

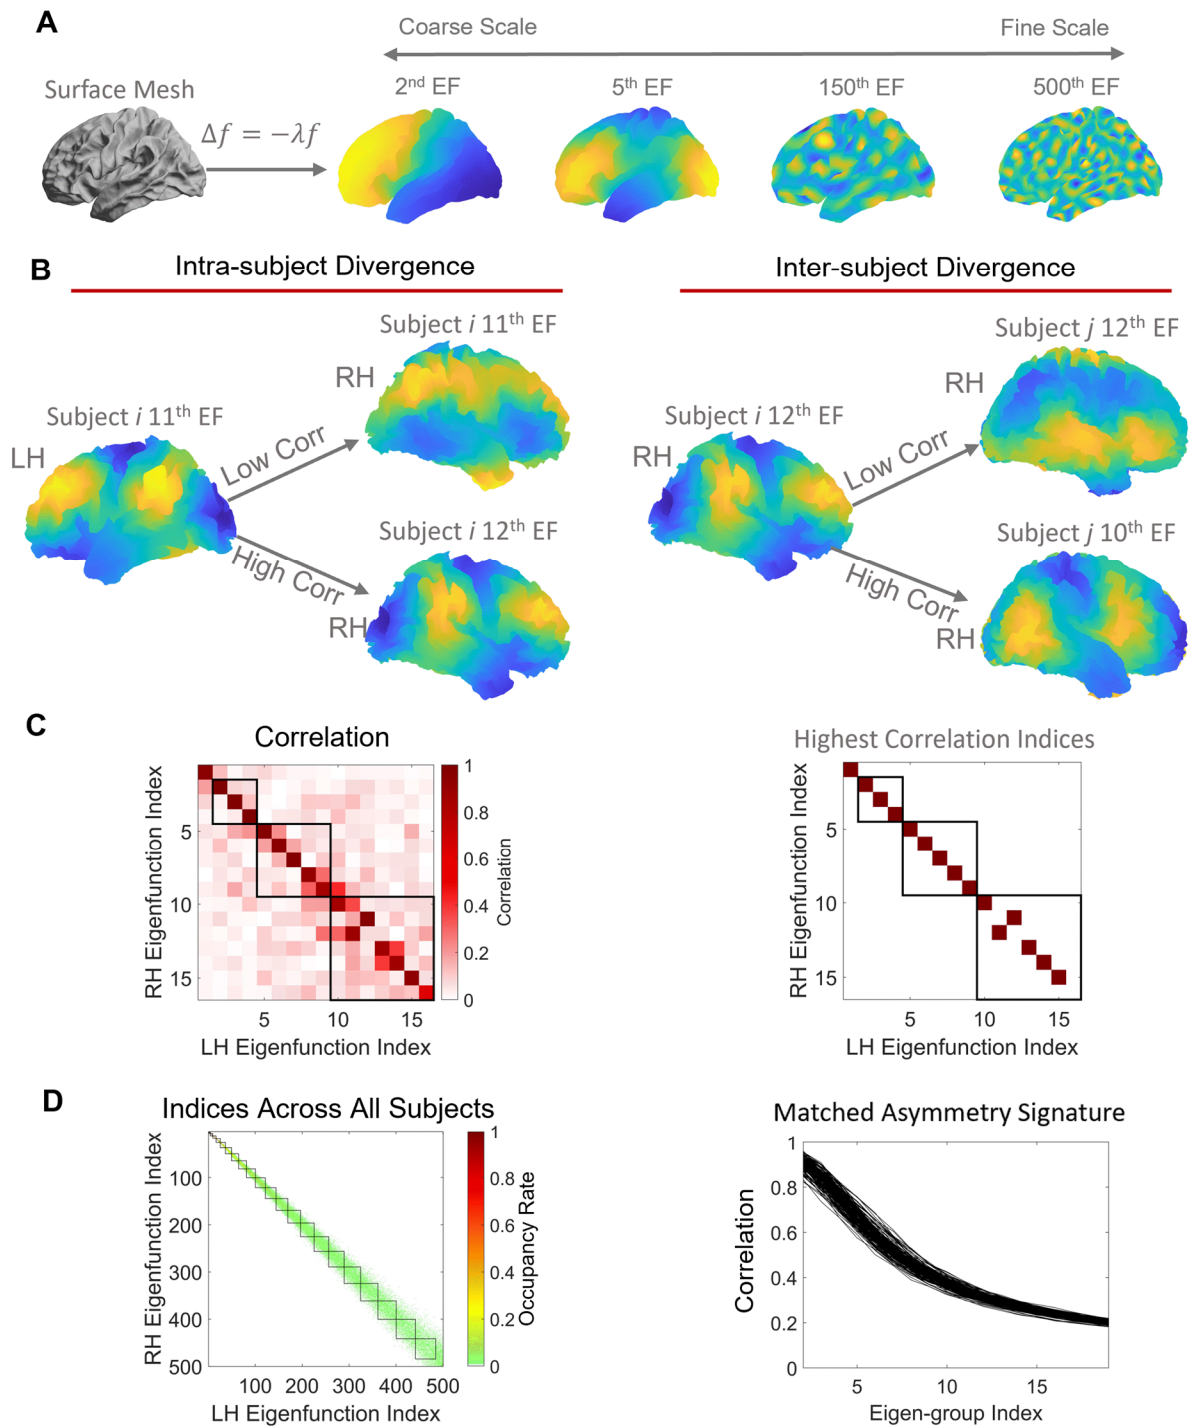

232

233 **Fig. 1.** Schematic of the analysis workflow. (A) The shapes of the left and right hemispheres  
234 (surface mesh) were independently decomposed using the eigenfunctions of the Laplace-Beltrami  
235 Operator (LBO). The eigenfunctions describe shape variations at different spatial scales, ordered  
236 from coarse (the second eigenfunction, EF) to fine (e.g., the 500<sup>th</sup> eigenfunction) scales. (B)  
237 Example of intra- and inter-subject divergences in eigenfunction patterns. The left panel shows  
238 that the 11<sup>th</sup> left eigenfunction is clearly more similar to the same individual's 12<sup>th</sup> right  
239 eigenfunction than the 11<sup>th</sup> right eigenfunction. The right panel shows that one individual's 12<sup>th</sup>  
240 right eigenfunction is more similar to another individual's 10<sup>th</sup> right eigenfunction than the 12<sup>th</sup>  
241 right eigenfunction. (C) Left panel, correlations between the left and right eigenfunctions from the  
242 individual in the left panel of (B). From this correlation matrix, we plotted the indices with the  
243 highest correlations across all 500 analyzed eigenfunctions in the right panel. The colored squares  
244 are the indices with the highest correlations. Here, we only show the first 16 eigenfunctions, and  
245 the squares are the boundaries between eigen-groups (see section 2.4. *Cortical shape harmonics*  
246 for details). For each row of the matrix, we take the maximum absolute correlation observed. The  
247 vector of these correlations across rows is the matched asymmetry signature (MAS). (D) Left  
248 panel, the mean of the highest indices across all subjects with respect to boundaries between eigen-  
249 groups as the squares. Most maximal correlations occurred within the same eigen-groups, but some  
250 of them appeared in adjacent eigen-groups. Right panel, we take the mean of MAS across each  
251 eigen-group and its adjacent two eigen-groups. This eigen-group based MAS collapses the 500  
252 eigenfunction-specific values to 20 eigen-group-specific values. Here, each line represents one  
253 individual. Next, we compare the MAS between the EP patients and the HC and use the eigen-  
254 groups with significant group differences to analyze their relationships with psychotic symptoms.  
255 Panel (A) was adapted from (21).

## 256 2.4. Cortical shape harmonics

257 In the case of a perfect sphere, the eigenvalues and eigenfunctions of the LBO can be sorted into  
258 distinct groups, called spherical harmonics. Within the same spherical harmonic group, the  
259 eigenvalues are degenerate (i.e., identical) and the corresponding eigenfunctions describe shape  
260 variations at similar spatial wavelengths but spatially varying along orthogonal axes (60). There  
261 are  $2(L + 1) - 1$  eigenfunctions in the  $L^{\text{th}}$  group (21, 60): the first eigen-group ( $L = 1$ ) is comprised  
262 of the 2<sup>nd</sup> to 4<sup>th</sup> eigenfunctions, the second eigen-group ( $L = 2$ ) is comprised of the 5<sup>th</sup> to 9<sup>th</sup>  
263 eigenfunctions, and so on. The first eigen-group describes the shape variations at the coarsest spatial  
264 scales, which are the variations along the  $X$ ,  $Y$ ,  $Z$  axis. Higher eigen-group measures shape variations  
265 at finer spatial scales (please see Fig 2B for the spatial scales of the eigen-groups). It has been  
266 shown that these spherical harmonic groups are roughly conserved for the cortex, since the cortex  
267 is topologically equivalent to a sphere (60). We can therefore use an approximation of the spatial  
268 wavelength in the spherical case to estimate the corresponding wavelength of each cortical eigen-  
269 group (21):

$$270 \quad W = \frac{2\pi R_s}{\sqrt{L(L+1)}} \quad (2)$$

271 where  $R_s$  is the corresponding sphere radius of the original object ( $R_s$  is about 67 mm for the  
272 population-based template, i.e., fsaverage in FreeSurfer), and  $L$  is the index of the eigen-group.  
273 Accordingly, because the ordering of specific eigenfunctions can vary not only within individuals  
274 but also between individuals (e.g., Fig. 1B, right panel), it is more appropriate to focus on the  
275 groupings of the eigenfunctions, rather than specific eigenfunctions themselves, when considering  
276 scale-specific asymmetries.

277 Figure 1 C and D indicate that although most of the highest left-right correlations occur for  
278 eigenfunctions from the same eigen-group, some of the maximal correlations are found in adjacent  
279 groups. For instance, the right panel of Fig. 1C shows that, the maximal correlation between the  
280 11<sup>th</sup> eigenfunction of the left cortex is the 12<sup>th</sup> eigenfunction of the right cortex (from the subject  
281 in Fig. 1B, left panel), and therefore, the indices of the maximal correlations are not entirely on  
282 the diagonal line, but both 11<sup>th</sup> and 12<sup>th</sup> eigenfunctions are within the 3<sup>rd</sup> eigen-group (the third  
283 black square, which encompasses the 10<sup>th</sup> to 16<sup>th</sup> eigenfunctions). We then took the average of the  
284 indices with the maximal correlations across all subjects to serve as occupancy rates in the left  
285 panel of Fig. 1D. For example, if the occupancy rate of the 401<sup>st</sup> left eigenfunction and the 400<sup>th</sup>  
286 right eigenfunction is 0.2, it means that 20% of the subjects' 401<sup>st</sup> left eigenfunction correlated the  
287 most with the 400<sup>th</sup> right eigenfunction. Fig. 1D, left panel also shows that the maximal left-right  
288 correlations generally on or around the diagonal line and occur within the same eigen-group (each  
289 black square represents each eigen-group) or its adjacent two eigen-groups.

290 We therefore used a sliding window approach and took the mean of MAS values within  
291 each eigen-group and its two adjacent groups to collapse the MAS from 500 eigenfunction-specific  
292 values to 20 group-specific values. For example, we took the mean correlations across the 1<sup>st</sup> to  
293 3<sup>rd</sup> eigen-groups (2<sup>nd</sup> to 16<sup>th</sup> eigenfunctions) to represent the second eigen-group of MAS and the  
294 mean across the 2<sup>nd</sup> to 4<sup>th</sup> eigen-groups (5<sup>th</sup> to 25<sup>th</sup> eigenfunctions) to represent the third eigen-  
295 group. In this study, we ignored the first eigen-group because it represents the coarsest spatial scale  
296 (~170 mm wavelength) and is highly conserved, providing little individual-specific information.  
297 We also did not consider the 20<sup>th</sup> eigen-group of MAS (362<sup>nd</sup> to 484<sup>th</sup> eigenfunctions), since the  
298 mean MAS across all subjects was low (i.e.,  $r < 0.2$ ,  $SD = 0.008$ ), indicating that very fine-scale  
299 variations in the shapes of the left and right hemispheres are largely independent. We excluded

300 data for one individual who showed eigen-group-specific MAS values that were more than three  
301 standard deviations below the sample mean.

302 Previous studies have shown that the shape measures of the LBO are robust to image noise  
303 (21, 58). To confirm the robustness of the MAS to image quality, we used the Euler numbers of  
304 the FreeSurfer, a widely used approach (21, 63-65) to quantify the image quality. We took the  
305 mean of the Euler number from the left and right hemispheres and calculated the then calculated  
306 the Pearson's correlation between the mean Euler number and the eigen-group-specific MAS  
307 values. All eigen-groups of the MAS were unrelated to the Euler number (absolute  $r$  values all <  
308 0.08;  $P_{FDR}$  all > 0.8). The results confirms that image quality generally does not influence the  
309 eigen-groups of MAS.

310 To summarize, we characterize the shape of each cortical hemisphere using the  
311 eigenfunctions of LBO, which offers a natural mathematical description of how the shape of an  
312 object varies through space. Eigenfunctions of the LBO correspond to fundamental spatial patterns  
313 (akin to axes or modes) of shape variation through space that are intrinsic to each cortical  
314 hemisphere of each individual. The corresponding eigenvalues correspond to the spatial frequency,  
315 or wavelength, of each eigenfunction, and are ordered such that low values corresponding to  
316 coarse-scale shape variations (e.g., broad anterior-posterior gradients; see Fig. 1A, 2<sup>nd</sup> EF) whereas  
317 high values correspond to fine-scale shape variations (e.g., local sulcal and gyral architecture; see  
318 Fig. 2A, 500<sup>th</sup> EF). The MAS is estimated as the correlation of the spatial pattern between a given  
319 eigenfunction in the left hemisphere and the most similar eigenfunction in the right hemisphere. It  
320 thus represents the degree of left-right similarity in fundamental patterns of shape variation. Since  
321 the cortex is topologically equivalent to a sphere, and sets of eigenfunctions in the spherical case



322 correspond to shape variations with the same wavelength, we can group eigenfunctions into eigen-  
323 groups of spatial patterns with similar wavelengths (see fig 2B). Averaging across Eigen-groups  
324 thus provides a more robust index of scale-specific shape asymmetries. Critically, our approach  
325 isolated asymmetries in cortical shape as distinct from those in size. This is critical, since shape  
326 asymmetries specifically are highly unique to individual brains and are under the influence of  
327 unique environmental influences, rather than genetic or common environmental factors (21). They  
328 thus offer a window into brain changes related to environmental risk factors.

329

### 330 *2.5. Size-based anatomical asymmetry*

331 To compare the effects of shape asymmetry to other commonly used morphological asymmetries,  
332 including cortical thickness, surface area, and LGI (the ratio between pial surface and outer  
333 smoothed surface automatically measured by FreeSurfer (66)), we applied a widely used  
334 asymmetry index (16, 67, 68) to quantify these non-shape-based morphological asymmetries as:

$$335 \quad AI^i = \frac{(M_L^i - M_R^i)}{0.5(M_L^i + M_R^i)} \quad (3)$$

336 where  $AI^i$  is the asymmetry index of subject  $i$ ,  $M_L^i$  is the mean value (mean of the whole  
337 hemisphere or region) of the morphological measurement, i.e., cortical thickness, surface area, or  
338 LGI, from subject  $i$ 's left hemisphere, and  $M_R^i$  is the value from the right hemisphere. We  
339 registered each subject image on the fs\_LR 32k template (44) and calculated the asymmetry at  
340 both global (i.e., whole hemisphere) and regional levels. For the regional level, we calculated the  
341 cortical thickness, surface area, and LGI of each region defined in the Desikan-Killiany (69) or

342 HCPMMP1 (70) atlases. There are 35 and 180 regions in each hemisphere of the Desikan-Killiany  
343 and HCPMMP1 atlases, respectively, but we excluded the hippocampus from the HCPMMP1 atlas  
344 as cortical thickness cannot be measured for this structure.

## 345 *2.6. Statistical analysis*

346 After calculating the eigenfunctions of LBO from shape-DNA algorithm (34, 35), the resulting  
347 eigenfunctions were further analyzed by using the MATLAB (version R2020b). We used a general  
348 linear model (GLM) to analyze the differences of each eigen-group between HCs and EP patients  
349 as well as between EP patients with non-affective and those with affective psychosis, controlling  
350 for sex, age, neuroimaging sites, and total brain size as confounding variables. We did not control  
351 for the medication effects because both exposure duration of antipsychotic drugs and CPZ of  
352 current antipsychotic drugs were unrelated to all the eigen-groups considered in this study ( $P_{FDR}$   
353  $> 0.8$ ) in EP patients. We also did not control for handedness because previous studies have found  
354 that cortical shape asymmetry is unrelated to handedness (21, 33). Eigen-groups analyzed in this  
355 study include their adjacent groups and are not independent of each other, and thus, we used a  
356 permutation test with 50,000 iterations for statistical inference. We used a tail approximation  
357 implemented in comparing the original GLM coefficients with permuted coefficients to ensure  
358 reliable  $P$ -value estimations (71) and controlled the false discovery rate (FDR,  $q = 0.05$ ) to correct  
359 for multiple comparisons.

360 We examined correlations between the eigen-groups of MAS and PANSS factors using  
361 canonical correlation analysis (CCA) on the 104 EP patients who responded to all items of the  
362 PANSS (45). We first used principal component analysis (PCA) to reduce dimensionality and  
363 minimize collinearity of the eigen-groups of MAS at different scales. We then applied the CCA to

364 identify maximal covariance (72) between the PCs of MAS eigen-groups and PANSS factors by  
365 linear combinations, controlling for age, sex, neuroimaging sites, and total brain size as  
366 confounding variables. The  $P$ -values of the canonical modes were calculated using a recently-  
367 developed CCA permutation procedure (72) with 50,000 iterations and controlling family-wise  
368 error rate (FWER) (72). We used bootstrapping with 1000 iterations to identify reliable estimates  
369 of loadings of each PANSS factor on the canonical variate (21, 73), and the resulting  $P$ -values  
370 were then corrected for multiple comparisons by FDR ( $q = 0.05$ ). We also applied bootstrapping  
371 with 1000 iterations and FDR correction to measure the reliable correlations between each eigen-  
372 group of the MAS and the canonical variate.

### 373 **3. Results**

#### 374 *3.1. Increased cortical shape asymmetries at coarse scales in EP patients*

375 We first used separate GLMs to compare the 2<sup>nd</sup> to 19<sup>th</sup> eigen-groups of MAS between patients  
376 and controls. We found that the 6<sup>th</sup> to 18<sup>th</sup> eigen-groups (Fig. 2A), spanning wavelengths between  
377 about 22 and 75 mm, were significantly different between the HC and EP groups ( $P_{FDR} < 0.05$ ;  
378 Cohen's  $d = 0.28$ – $0.51$ ; Fig. S1), with the MAS in the EP group being significantly lower than the  
379 HC group. In other words, patients showed greater asymmetry in shape than controls. The  
380 distributions of the MAS of these two groups are shown in Fig. S1. Although the 6<sup>th</sup> to 18<sup>th</sup> eigen-  
381 groups were all significantly different between the HC and EP groups, the effect sizes of some  
382 eigen-groups, such as the 11<sup>th</sup> and 12<sup>th</sup> eigen-groups ( $d = 0.51$  and  $0.49$ , respectively), were higher  
383 than some other eigen-groups, such as the 17<sup>th</sup> and 18<sup>th</sup> eigen-groups ( $d = 0.29$  and  $0.28$ ,  
384 respectively) (Fig. S1). In contrast, we found that commonly used morphological asymmetries, i.e.,  
385 based on cortical thickness, surface area, and LGI at both global (GLM  $P$ -values  $> 0.05$ ; Fig. S4)

386 and regional levels using either the HCPMMP1 or Desikan-Killiany atlases, were not different  
387 between these two groups (GLM  $P_{FDR} > 0.05$ ; Table S3 and S4). Thus, asymmetries of cortical  
388 shape are more sensitive than the traditional morphological measures in discriminating HC and EP  
389 individuals.

390         Next, we compared patients with affective psychosis and those with non-affective  
391 psychosis. All eigen-groups (2<sup>nd</sup> to 19<sup>th</sup>) of the MAS were not significantly different between  
392 groups ( $P_{FDR} > 0.05$ ).

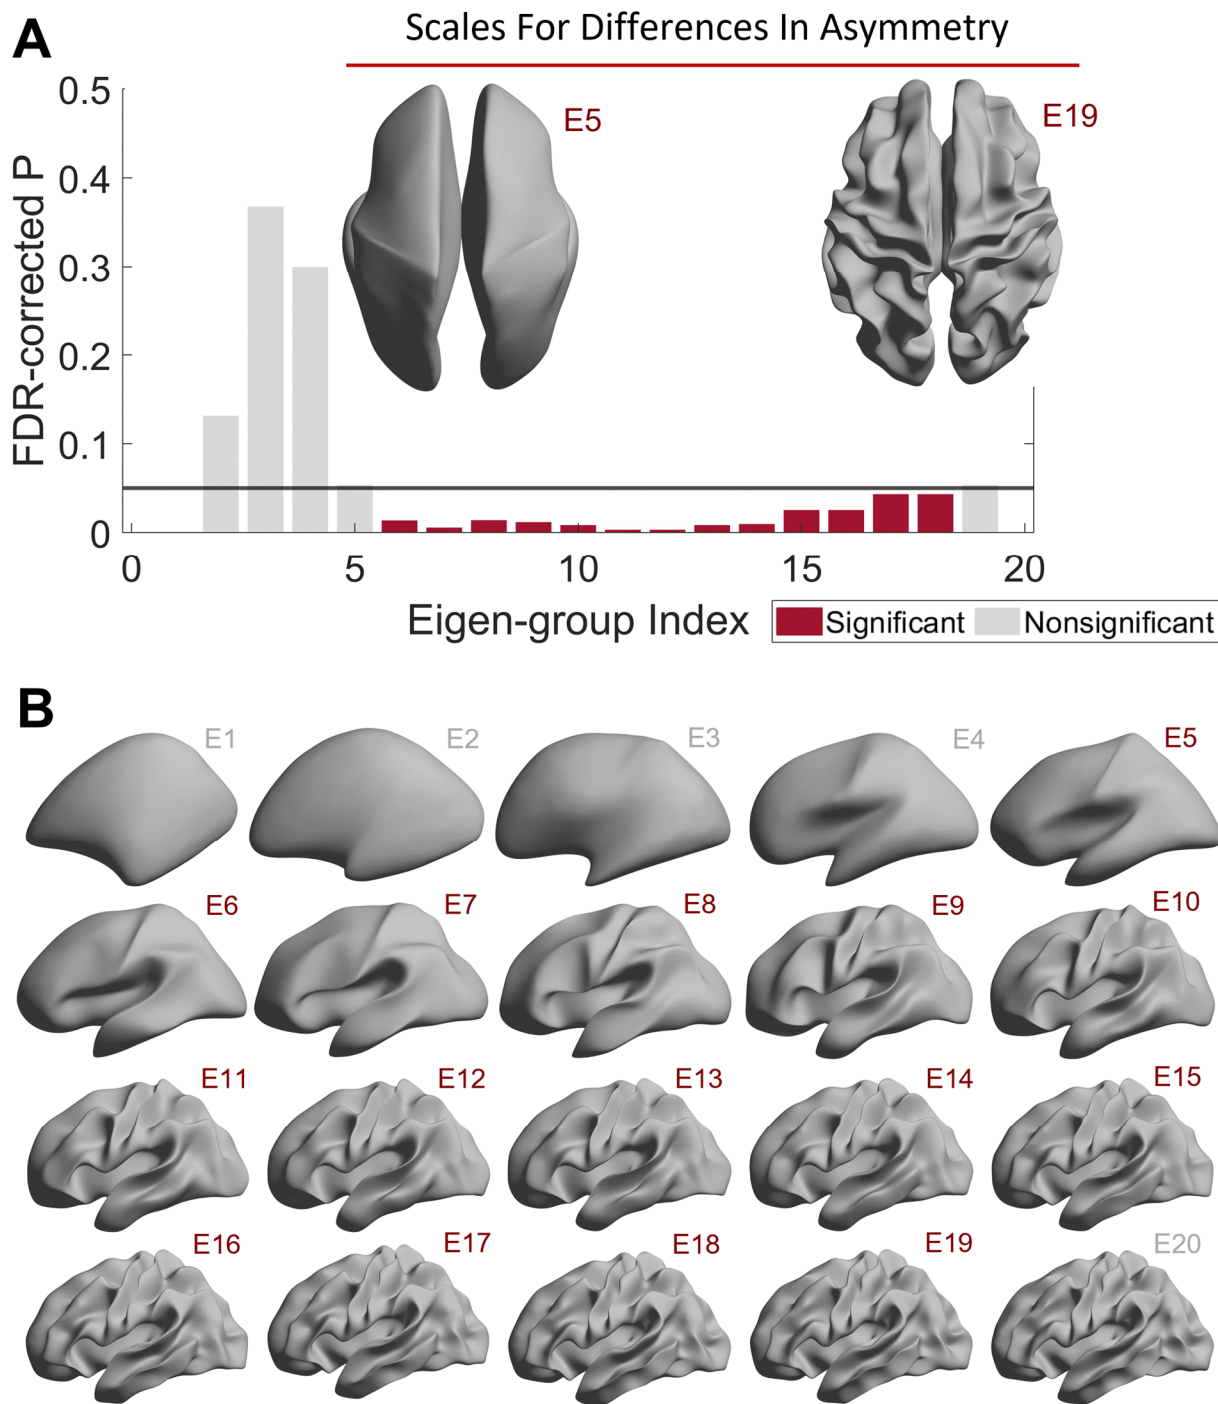

393  
394 **Fig. 2.** Early psychosis is associated with scale-specific differences in cortical shape asymmetry.  
395 (A) The 6<sup>th</sup> to 18<sup>th</sup> eigen-groups of the MAS are different between HC and EP groups. We used a  
396 sliding window approach for MAS, and thus, the wavelength of the 6<sup>th</sup> to 18<sup>th</sup> eigen-groups of the  
397 MAS are equivalent to the 5<sup>th</sup> to 19<sup>th</sup> original eigen-groups, which are between ~22 (left inset) and

398 ~75 (right inset) mm. The cortical surfaces are reconstructed from a population-based template  
399 (fsaverage). **(B)** Cortical surfaces were reconstructed at different spatial wavelengths from the first  
400 eigen-group (E1) and incrementally adding more eigen-groups to the first 20 eigen-groups (E20).  
401 Note, these groups are based on the original eigen-groups. Panel (B) was adapted from (21).

### 402 *3.2. Cortical shape asymmetries correlate with symptom severity*

403 We used CCA (72) to examine relationships between the eigen-groups of MAS and the five factors  
404 of psychotic symptoms measured by the PANSS. We applied PCA to the 6<sup>th</sup> to 18<sup>th</sup> eigen-groups,  
405 which showed differences in our group analysis (see Fig. 2), and retained the first two principal  
406 components (PCs), which explained 92% of the variance.

407 The CCA identified a single canonical mode that was statistically significant (CCA  $r =$   
408 0.45;  $P_{FWER} = 0.002$ ; Fig. 3A). The loadings of the first two PCs (0.54 and 0.83) of the MAS on  
409 the canonical variate were all significant ( $P_{FDR} < 0.0001$ ), and the 6<sup>th</sup> to 9<sup>th</sup> eigen-groups were  
410 positively correlated with the canonical variate ( $P_{FDR} < 0.05$ ; Fig. 3B), with corresponding  
411 wavelength range of ~40 to ~75 mm (Fig. 3B insets). The loading of PANSS factors was negative  
412 ( $P_{FDR} < 0.001$ ) for excitement (representing impulsivity (50)) and positive ( $P_{FDR} < 0.001$ ) for  
413 emotional distress (Fig. 3C), indicating that patients with higher cortical shape asymmetry show  
414 more impulsivity symptoms and less severe emotional distress. We also confirmed that the  
415 antipsychotic drug exposure time was not correlated to all PANSS factors ( $P_{FDR} > 0.2$ ).

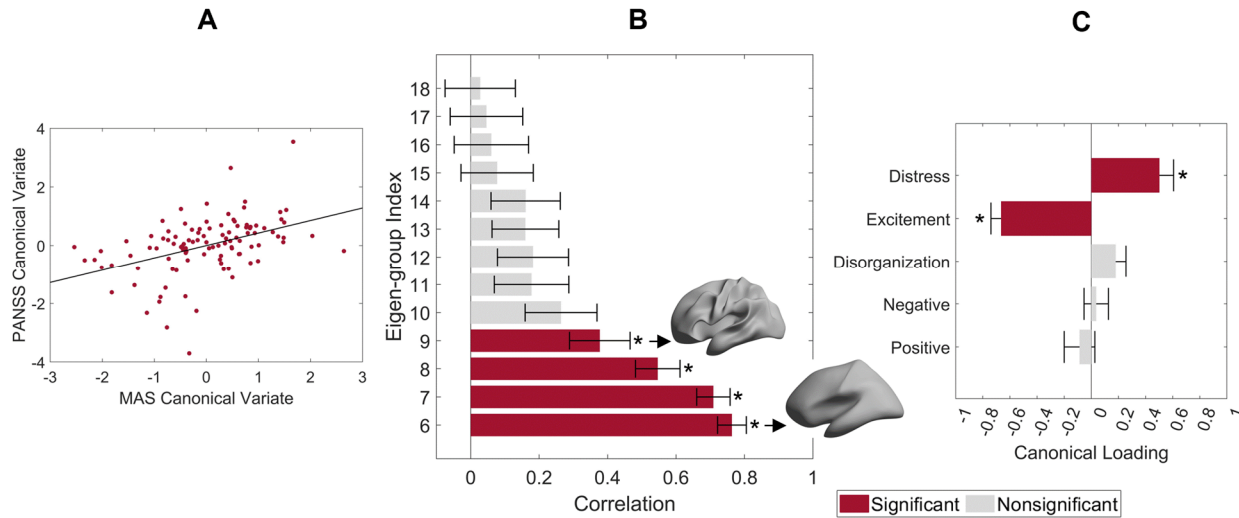

416

417 **Fig. 3.** Individual differences in the matched asymmetry signature (MAS) are correlated with  
418 symptom severity. **(A)** Association between the canonical variates of the first two PCs of the eigen-  
419 groups of MAS and the five PANSS factors with the corresponding least-squares regression line  
420 in black. **(B)** Correlations between the 6<sup>th</sup> to 18<sup>th</sup> eigen-groups of the matched asymmetry signature  
421 and the corresponding canonical variate; the 6<sup>th</sup> to 9<sup>th</sup> eigen-groups are significant. Insets represent  
422 the range of the corresponding spatial wavelengths. **(C)** Canonical variate loadings of the PANSS  
423 factors; the excitement and emotional distress factors are significant. For panels B and C, the error  
424 bars represent  $\pm 2$  bootstrapped standard errors (SE), and the asterisks denote bootstrapped  $P_{FDR}$   
425  $< 0.05$ .

#### 426 4. Discussion

427 Altered brain asymmetries have frequently been reported in patients with psychosis. Here, we  
428 applied a multiscale approach to examine abnormalities of cortical shape asymmetry, independent  
429 of variations in regional size, in EP patients. We found that EP patients showed a higher degree of  
430 cortical shape asymmetry across a range of coarse spatial scales when compared to HC. In contrast,  
431 no group differences in asymmetries in cortical thickness, surface area, and LGI were identified.

432 EP patients with a higher cortical shape asymmetry showed more severe excitement and less severe  
433 emotional distress. Together, these findings support the sensitivity of our spectral approach for  
434 characterizing shape asymmetries in psychosis, indicating that altered asymmetries of shape are  
435 expressed at certain spatial wavelengths, and that individual differences in these asymmetries are  
436 related to symptom severity.

#### 437 *4.1. EP patients show increased asymmetry of cortical shape at coarse scales*

438 Surprisingly, we found that EP patients had greater left-right asymmetry of cortical shape when  
439 compared to controls. This finding contradicts to many previous studies reporting reduced  
440 asymmetries in patients (19, 20, 29, 30, 36). Conventional asymmetry studies use size-related  
441 measures, such as volume or cortical thickness, which can conflate variations in shape and size  
442 (21). The distinction between shape and size-based features is crucial because two objects can have  
443 similar volumes but with very different shapes (34, 74). Although the literature on shape  
444 asymmetry in patients with psychosis is very limited, one prior study has also found an increased  
445 asymmetry of global cortical shape in patients with schizophrenia (28). Núñez et al. (28) applied  
446 dice coefficient to measure cortical asymmetry by calculating the ratio of the intersection area  
447 between the original cortex (e.g., right cortex) and flipped cortex (new right cortex that was flipped  
448 from the left) to the total area of the original cortex and the flipped cortex. However, this approach  
449 cannot disentangle the effects of shape from size and cannot measure scale-specific effect. For an  
450 extreme example, even if two hemispheres are symmetric in shape but one hemisphere is  
451 proportional larger than the other, the dice coefficient may still be the same as another subject  
452 whose two hemispheres are asymmetric in shape but identical in volume. Previous study has shown  
453 that isolating the shape asymmetry from the size effect providing superior subject identifiability.



454 Unlike dice coefficient, the MAS disentangles the shape asymmetry from the size effects and  
455 decomposes the asymmetry at different spatial scales. Our spectral approach suggests that this  
456 increased asymmetry is apparent within a specific spatial wavelength range between ~22 mm and  
457 ~75 mm. Among this range, the strongest effect size occurred at the spatial wavelength of about  
458 37 mm, while the effect sizes decrease at finer spatial wavelength. The results are in line with our  
459 previous study (21) that found the optimal subject identifiability of cortical shape asymmetry  
460 occurred at the spatial wavelength of about 37 mm.

461 Our scale-specific approach is akin to analyzing the seismic wave frequencies of  
462 earthquakes at the global tectonic level, whereas classical point-wise approaches are analogous to  
463 only focusing on a specific city (21), which may miss broader patterns. Indeed, grey matter  
464 abnormalities in patients with psychosis are often widespread (13, 75). However, such deviations  
465 may show minimal overlap in specific brain locations across patients (76-78), potentially reflecting  
466 the known clinical heterogeneity of the condition (76, 79). The vast majority of past work on  
467 cerebral asymmetries in psychosis has focused on size-related measures, estimated at global,  
468 regional, or point-wise levels (13, 20, 29, 36), and are insensitive in capturing diffused and  
469 heterogeneous brain abnormalities in patients with psychosis. Our analysis found no differences  
470 in the asymmetry of size-related measures at global or regional levels, which aligns with other  
471 works showing limited evidence for altered asymmetry of these measures in people with psychosis  
472 (11-14, 30). Indeed, the findings have been highly inconsistent, with one meta-analysis showing  
473 that even for the superior temporal gyrus –the region most widely reported as showing abnormal  
474 asymmetry in patients with schizophrenia– about half of the studies do not find evidence of  
475 significantly altered size-based asymmetry (10). Similarly, although some studies have reported  
476 decreased LGI values in patients with psychosis or those risk groups (80-82), the results were not

477 consistently reproduced, with some studies showed increased gyrification or absent of the effects  
478 (30, 83-85). In this study, we found no differences in the LGI asymmetry at both global or regional  
479 levels. Our results were in line with previous study that shows intrinsic cortical shapes derived  
480 from the LBO are superior than the LGI in identifying individual variations (33). Although LGI is  
481 related to the cortical shape, it measures the gyrification at vertex level, and the result of no group  
482 effects on LGI asymmetry is in line with our MAS finding that the asymmetry effects are shown  
483 at coarse scales. Moreover, similar to the size-related measures, LGI is also a point-wise approach  
484 and is insensitive to the diffused abnormalities. Our findings suggest that the spectral approach  
485 developed here offers a new window in understanding asymmetries of cortical shape. The MAS  
486 measures the cortex as a whole but characterizes the shape variations of it across multiple spatial  
487 scales and is more sensitive to psychosis-related brain changes than other traditional  
488 morphological measures, such as cortical thickness, surface area, or LGI. Replication of these  
489 findings in independent samples will be an important extension of this work.

490 Our spectral approach offers a natural way of characterizing fluctuating asymmetries,  
491 which capture individual-specific brain phenotypes (21). Fluctuating asymmetries are  
492 hypothesized to arise from developmental instability or individual-specific genetic perturbations  
493 (27, 28), but it has been shown that fluctuating asymmetries in cortical shape are mainly driven by  
494 person-specific environmental influences (21). Many studies have suggested that environmental  
495 factors in early life, such as maternal stress, infections, nutrition during pregnancy, childhood  
496 adversity, and stress, may affect neurodevelopment and contribute to psychosis (7, 86). Studies of  
497 fluctuating asymmetry in the human brain are limited, but some have found that fluctuating  
498 asymmetries of the left-right sides of the human body, such as asymmetry of left and right  
499 fingerprints, are also increased in patients with psychosis (26, 87-89).

#### 500 4.2. Cortical shape asymmetry is correlated with psychotic symptoms

501 EP patients with higher cortical shape asymmetries at coarse scales showed more severe  
502 excitement symptoms and less severe emotional distress. These coarse spatial scales correspond  
503 to wavelengths of about 40 to 75 mm. Notably, this range is within the spatial scales previously  
504 found to be optimal (larger than 37 mm) for distinguishing individual brains and related to general  
505 cognitive functions (21). Together, these findings suggest that cortical shape asymmetries at coarse  
506 scales, but not fine scales, contain personalized brain features, and these features have implications  
507 for both normal and abnormal brain function. Past studies using point-wise approaches have found  
508 associations between cortical asymmetries of size-based measures and hallucinations (37, 90), but  
509 the findings have not been consistently replicated. For example, Ohi et al. (30) did not find any  
510 correlation between the asymmetries of volume, thickness, and surface area in the superior  
511 temporal gyrus with any clinical symptoms.

512 The excitement factor of the PANSS may be more related to ADHD and oppositional  
513 defiant disorder, while the emotional distress factor is related to anxiety, depression, and stress.  
514 Studies have found abnormalities in cortical asymmetry among the above disorders (7, 91, 92) and  
515 have suggested that various forms of stress are key risk factors of many mental disorders and may  
516 also influence normal brain development, resulting in abnormal brain asymmetries (7). However,  
517 we did not find differences in MAS between patients with affective psychosis and those with non-  
518 affective psychosis. This result may be due to the small sample size of patients with affective  
519 psychosis (n = 32).

#### 520 5. Limitations and Future Directions

521 In this study, we analyzed EP patients, which minimizes the effects of prolonged medication.  
522 Nonetheless, about 78% of the patients had prior exposure to antipsychotics. Although we found  
523 that antipsychotic drug exposure time and current CPZ value were unrelated to MAS, the long-  
524 term effects of medication on shape asymmetries remain unclear. Future work should aim to  
525 replicate our results on medication-naive patients with first-episode psychosis or to compare the  
526 results in different psychosis stages, such as chronic schizophrenia. Moreover, it would also be  
527 beneficial for future studies to utilize this novel methods to a wide range of neuropsychiatric and  
528 neurological diseases, such as ADHD, autism, bipolar disorders, and dementia, given that  
529 abnormal brain asymmetries have been reported in these diseases (7, 17, 93, 94). Finally, the MAS  
530 also has the potential to measure the development of cortical asymmetry in children and  
531 adolescents or its relationships with brain age.

## 532 **6. Conclusion**

533 We developed a novel method to derive a multiscale characterization of cortical shape asymmetries  
534 and showed that patients with early psychosis displayed increased asymmetries at coarse scales.  
535 In contrast, asymmetries of cortical thickness, surface area, and gyrification were not different  
536 between patient and control groups. We also found that patients with a higher degree of cortical  
537 shape asymmetries at coarse scales showed more severe excitement symptoms and less severe  
538 emotional distress. Together, these findings indicate that cortical shape asymmetries are more  
539 sensitive than other morphological asymmetries to capturing differences between patients with  
540 psychosis and healthy controls, and these asymmetry features were related to the excitement and  
541 emotional distress symptoms.

## 542 **7. Acknowledgments**

543 A.F. was supported by the Sylvia and Charles Viertel Foundation, National Health and Medical  
544 Research Council (IDs: 1197431 and 1146292), and Australian Research Council  
545 (ID: DP200103509). J.T. was supported by a Turner Impact Fellowship from the Turner Institute  
546 for Brain and Mental Health, Monash University. Data were provided by HCP-EP: Principal  
547 Investigators: Alan Breier, Martha Shenton.

548 **8. Declarations of interest:** K.M.A. is a scientific advisor and shareholder of BrainKey Inc., a  
549 medical image analysis software company. The other authors declare that they have no competing  
550 interests.

## 551 **9. Ethics Statement**

552 All participants provided their written informed consent to participate in the HCP-EP, and the  
553 HCP-EP was reviewed and approved by the Human Connectome Project. The HCP-EP complied  
554 with the ethical standards of the relevant national and institutional committees on human  
555 experimentation and with the code of ethics of the World Medical Association (the Helsinki  
556 Declaration of 1975, as revised in 2013).

557

## 558 **References**

- 559 1. Van Essen DC, Donahue CJ, Coalson TS, Kennedy H, Hayashi T, Glasser MF. Cerebral cortical  
560 folding, parcellation, and connectivity in humans, nonhuman primates, and mice. *Proc Natl Acad Sci U S*  
561 *A*. 2019.
- 562 2. Gomez-Robles A, Hopkins WD, Sherwood CC. Increased morphological asymmetry, evolvability  
563 and plasticity in human brain evolution. *Proc Biol Sci*. 2013;280(1761): 115-26.
- 564 3. Neubauer S, Gunz P, Scott NA, Hublin JJ, Mitteroecker P. Evolution of brain lateralization: A  
565 shared hominid pattern of endocranial asymmetry is much more variable in humans than in great apes.  
566 *Sci Adv*. 2020;6(7):eaax9935.
- 567 4. Toga AW, Thompson PM. Mapping brain asymmetry. *Nat Rev Neurosci*. 2003;4(1):37-48.

- 568 5. Gunturkun O, Strockens F, Ocklenburg S. Brain Lateralization: A Comparative Perspective.  
569 *Physiol Rev.* 2020;100(3):1019-63.
- 570 6. Crow TJ. The 'big bang' theory of the origin of psychosis and the faculty of language. *Schizophr*  
571 *Res.* 2008;102(1-3):31-52.
- 572 7. Berretz G, Wolf OT, Gunturkun O, Ocklenburg S. Atypical lateralization in neurodevelopmental  
573 and psychiatric disorders: What is the role of stress? *Cortex.* 2020;125:215-32.
- 574 8. Corballis MC. Early signs of brain asymmetry. *Trends Cogn Sci.* 2013;17(11):554-5.
- 575 9. Amiez C, Sallet J, Hopkins WD, Meguerditchian A, Hadj-Bouziane F, Ben Hamed S, et al. Sulcal  
576 organization in the medial frontal cortex provides insights into primate brain evolution. *Nat Commun.*  
577 2019;10(1):3437.
- 578 10. Chance SA, Casanova MF, Switala AE, Crow TJ. Auditory cortex asymmetry, altered minicolumn  
579 spacing and absence of ageing effects in schizophrenia. *Brain.* 2008;131(Pt 12):3178-92.
- 580 11. Deep-Soboslay A, Hyde TM, Callicott JP, Lener MS, Verchinski BA, Apud JA, et al. Handedness,  
581 heritability, neurocognition and brain asymmetry in schizophrenia. *Brain.* 2010;133(10):3113-22.
- 582 12. Royer C, Delcroix N, Leroux E, Alary M, Razafimandimby A, Brazo P, et al. Functional and  
583 structural brain asymmetries in patients with schizophrenia and bipolar disorders. *Schizophr Res.*  
584 2015;161(2-3):210-4.
- 585 13. Crespo-Facorro B, Roiz-Santianez R, Perez-Iglesias R, Rodriguez-Sanchez JM, Mata I, Tordesillas-  
586 Gutierrez D, et al. Global and regional cortical thinning in first-episode psychosis patients: relationships  
587 with clinical and cognitive features. *Psychol Med.* 2011;41(7):1449-60.
- 588 14. Bakalar JL, Greenstein DK, Clasen L, Tossell JW, Miller R, Evans AC, et al. General absence of  
589 abnormal cortical asymmetry in childhood-onset schizophrenia: a longitudinal study. *Schizophr Res.*  
590 2009;115(1):12-6.
- 591 15. Kong XZ, Mathias SR, Guadalupe T, Group ELW, Glahn DC, Franke B, et al. Mapping cortical brain  
592 asymmetry in 17,141 healthy individuals worldwide via the ENIGMA Consortium. *Proc Natl Acad Sci U S*  
593 *A.* 2018;115(22):E5154-E63.
- 594 16. Kong XZ, Postema MC, Guadalupe T, de Kovel C, Boedhoe PSW, Hoogman M, et al. Mapping  
595 brain asymmetry in health and disease through the ENIGMA consortium. *Hum Brain Mapp.* 2020.
- 596 17. Postema MC, van Rooij D, Anagnostou E, Arango C, Auzias G, Behrmann M, et al. Altered  
597 structural brain asymmetry in autism spectrum disorder in a study of 54 datasets. *Nat Commun.*  
598 2019;10(1):4958.
- 599 18. Gomez-Robles A, Hopkins WD, Schapiro SJ, Sherwood CC. The heritability of chimpanzee and  
600 human brain asymmetry. *Proc Biol Sci.* 2016;283(1845).
- 601 19. Clark GM, Crow TJ, Barrick TR, Collinson SL, James AC, Roberts N, et al. Asymmetry loss is local  
602 rather than global in adolescent onset schizophrenia. *Schizophr Res.* 2010;120(1-3):84-6.
- 603 20. Ratnanather JT, Poynton CB, Pisano DV, Crocker B, Postell E, Cebon S, et al. Morphometry of  
604 superior temporal gyrus and planum temporale in schizophrenia and psychotic bipolar disorder.  
605 *Schizophr Res.* 2013;150(2-3):476-83.
- 606 21. Chen Y-C, Arnatkeviciute A, McTavish E, Pang J, Chopra S, Suo C, et al. The individuality of shape  
607 asymmetries of the human cerebral cortex. *eLife.* 2022;11:e75056.
- 608 22. Sherwood CC, Gómez-Robles A. Brain Plasticity and Human Evolution. *Annual Review of*  
609 *Anthropology.* 2017;46(1):399-419.
- 610 23. Corballis MC, Haberling IS. The Many Sides of Hemispheric Asymmetry: A Selective Review and  
611 Outlook. *J Int Neuropsychol Soc.* 2017;23(9-10):710-8.
- 612 24. Francks C. Exploring human brain lateralization with molecular genetics and genomics. *Ann N Y*  
613 *Acad Sci.* 2015;1359:1-13.
- 614 25. de Kovel CGF, Lisgo SN, Fisher SE, Francks C. Subtle left-right asymmetry of gene expression  
615 profiles in embryonic and foetal human brains. *Sci Rep.* 2018;8(1):12606.

- 616 26. Graham J, Özener B. Fluctuating Asymmetry of Human Populations: A Review. *Symmetry*.  
617 2016;8(12).
- 618 27. Dongen SV. Fluctuating asymmetry and developmental instability in evolutionary biology: past,  
619 present and future. *J Evol Biol*. 2006;19(6):1727-43.
- 620 28. Nunez C, Paipa N, Senior C, Coromina M, Siddi S, Ochoa S, et al. Global brain asymmetry is  
621 increased in schizophrenia and related to avolition. *Acta Psychiatr Scand*. 2017;135(5):448-59.
- 622 29. Huang K, Kang Y, Wu Z, Wang Y, Cai S, Huang L. Asymmetrical alterations of grey matter among  
623 psychiatric disorders: A systematic analysis by voxel-based activation likelihood estimation. *Prog*  
624 *Neuropsychopharmacol Biol Psychiatry*. 2021;110:110322.
- 625 30. Ohi K, Matsuda Y, Shimada T, Yasuyama T, Oshima K, Sawai K, et al. Structural alterations of the  
626 superior temporal gyrus in schizophrenia: Detailed subregional differences. *Eur Psychiatry*. 2016;35:25-  
627 31.
- 628 31. Zhao L, Matloff W, Shi Y, Cabeen RP, Toga AW. Mapping Complex Brain Torque Components and  
629 Their Genetic and Phenomic Architecture in 24,112 healthy individuals. 2021.
- 630 32. Kang X, Herron TJ, Ettliger M, Woods DL. Hemispheric asymmetries in cortical and subcortical  
631 anatomy. *Laterality*. 2015;20(6):658-84.
- 632 33. Wachinger C, Golland P, Kremen W, Fischl B, Reuter M, Alzheimer's Disease Neuroimaging I.  
633 BrainPrint: a discriminative characterization of brain morphology. *Neuroimage*. 2015;109:232-48.
- 634 34. Reuter M, Wolter FE, Shenton M, Niethammer M. Laplace-Beltrami Eigenvalues and Topological  
635 Features of Eigenfunctions for Statistical Shape Analysis. *Comput Aided Des*. 2009;41(10):739-55.
- 636 35. Reuter M, Wolter FE, Peinecke N. Laplace–Beltrami spectra as ‘Shape-DNA’ of surfaces and  
637 solids. *Computer-Aided Design*. 2006;38(4):342-66.
- 638 36. Damme KSF, Vargas T, Calhoun V, Turner J, Mittal VA. Global and Specific Cortical Volume  
639 Asymmetries in Individuals With Psychosis Risk Syndrome and Schizophrenia: A Mixed Cross-sectional  
640 and Longitudinal Perspective. *Schizophr Bull*. 2020;46(3):713-21.
- 641 37. Rollins CPE, Garrison JR, Arribas M, Seyedsalehi A, Li Z, Chan RCK, et al. Evidence in cortical  
642 folding patterns for prenatal predispositions to hallucinations in schizophrenia. *Transl Psychiatry*.  
643 2020;10(1):387.
- 644 38. Lewandowski KE, Bouix S, Ongur D, Shenton ME. Neuroprogression across the Early Course of  
645 Psychosis. *J Psychiatr Brain Sci*. 2020;5.
- 646 39. Harms MP, Somerville LH, Ances BM, Andersson J, Barch DM, Bastiani M, et al. Extending the  
647 Human Connectome Project across ages: Imaging protocols for the Lifespan Development and Aging  
648 projects. *Neuroimage*. 2018;183:972-84.
- 649 40. Glasser MF, Sotiropoulos SN, Wilson JA, Coalson TS, Fischl B, Andersson JL, et al. The minimal  
650 preprocessing pipelines for the Human Connectome Project. *Neuroimage*. 2013;80:105-24.
- 651 41. Fischl B, Salat DH, Busa E, Albert M, Dieterich M, Haselgrove C, et al. Whole Brain Segmentation  
652 Automated Labeling of Neuroanatomical Structures in the Human Brain. *Neuron*. 2002;33(3):341–55.
- 653 42. Jenkinson M, Beckmann CF, Behrens TE, Woolrich MW, Smith SM. *Fsl*. *Neuroimage*.  
654 2012;62(2):782-90.
- 655 43. Jenkinson M, Bannister P, Brady M, Smith S. Improved Optimization for the Robust and Accurate  
656 Linear Registration and Motion Correction of Brain Images. *NeuroImage*. 2002;17(2):825-41.
- 657 44. Van Essen DC, Glasser MF, Dierker DL, Harwell J, Coalson T. Parcellations and hemispheric  
658 asymmetries of human cerebral cortex analyzed on surface-based atlases. *Cereb Cortex*.  
659 2012;22(10):2241-62.
- 660 45. Kay SR, Fiszbein A, Opler LA. The Positive and Negative Syndrome Scale (PANSS) for  
661 Schizophrenia. *Schizophrenia Bulletin*. 1987;13(2):261–76.

- 662 46. van der Gaag M, Hoffman T, Remijnsen M, Hijman R, de Haan L, van Meijel B, et al. The five-factor  
663 model of the Positive and Negative Syndrome Scale II: a ten-fold cross-validation of a revised model.  
664 *Schizophr Res.* 2006;85(1-3):280-7.
- 665 47. Best MW, Law H, Pyle M, Morrison AP. Relationships between psychiatric symptoms,  
666 functioning and personal recovery in psychosis. *Schizophr Res.* 2020;223:112-8.
- 667 48. Marumo K, Takizawa R, Kinou M, Kawasaki S, Kawakubo Y, Fukuda M, et al. Functional  
668 abnormalities in the left ventrolateral prefrontal cortex during a semantic fluency task, and their  
669 association with thought disorder in patients with schizophrenia. *Neuroimage.* 2014;85 Pt 1:518-26.
- 670 49. Ng R, Fish S, Granholm E. Insight and theory of mind in schizophrenia. *Psychiatry Res.*  
671 2015;225(1-2):169-74.
- 672 50. Okada N, Takahashi K, Nishimura Y, Koike S, Ishii-Takahashi A, Sakakibara E, et al. Characterizing  
673 prefrontal cortical activity during inhibition task in methamphetamine-associated psychosis versus  
674 schizophrenia: a multi-channel near-infrared spectroscopy study. *Addict Biol.* 2016;21(2):489-503.
- 675 51. Sarzynska-Wawer J, Wawer A, Pawlak A, Szymanowska J, Stefaniak I, Jarkiewicz M, et al.  
676 Detecting formal thought disorder by deep contextualized word representations. *Psychiatry Res.*  
677 2021;304:114135.
- 678 52. Nishimura Y, Takizawa R, Muroi M, Marumo K, Kinou M, Kasai K. Prefrontal cortex activity during  
679 response inhibition associated with excitement symptoms in schizophrenia. *Brain Res.* 2011;1370:194-  
680 203.
- 681 53. Costello AB, Osborne J. Best practices in exploratory factor analysis four recommendations for  
682 getting the most from your analysis. *Practical Assessment, Research, and Evaluation.* 2005;10.
- 683 54. Koutsouleris N, Gaser C, Jager M, Bottlender R, Frodl T, Holzinger S, et al. Structural correlates of  
684 psychopathological symptom dimensions in schizophrenia: a voxel-based morphometric study.  
685 *Neuroimage.* 2008;39(4):1600-12.
- 686 55. Anderson A, Wilcox M, Savitz A, Chung H, Li Q, Salvatore G, et al. Sparse factors for the positive  
687 and negative syndrome scale: which symptoms and stage of illness? *Psychiatry Res.* 2015;225(3):283-90.
- 688 56. Rouquette A, Falissard B. Sample size requirements for the internal validation of psychiatric  
689 scales. *Int J Methods Psychiatr Res.* 2011;20(4):235-49.
- 690 57. Shafer A, Dazzi F. Meta-analysis of the positive and Negative Syndrome Scale (PANSS) factor  
691 structure. *J Psychiatr Res.* 2019;115:113-20.
- 692 58. Reuter M. Hierarchical Shape Segmentation and Registration via Topological Features of  
693 Laplace-Beltrami Eigenfunctions. *International Journal of Computer Vision.* 2009;89(2-3):287-308.
- 694 59. Konukoglu E, Glocker B, Criminisi A, Pohl KM. WESD--Weighted Spectral Distance for measuring  
695 shape dissimilarity. *IEEE Trans Pattern Anal Mach Intell.* 2013;35(9):2284-97.
- 696 60. Robinson PA, Zhao X, Aquino KM, Griffiths JD, Sarkar S, Mehta-Pandjee G. Eigenmodes of brain  
697 activity: Neural field theory predictions and comparison with experiment. *Neuroimage.* 2016;142:79-98.
- 698 61. Lian Z, Godil A, Bustos B, Daoudi M, Hermans J, Kawamura S, et al. A comparison of methods for  
699 non-rigid 3D shape retrieval. *Pattern Recognition.* 2013;46(1):449-61.
- 700 62. Finn ES, Shen X, Scheinost D, Rosenberg MD, Huang J, Chun MM, et al. Functional connectome  
701 fingerprinting: identifying individuals using patterns of brain connectivity. *Nat Neurosci.*  
702 2015;18(11):1664-71.
- 703 63. Rosen AFG, Roalf DR, Ruparel K, Blake J, Seelaus K, Villa LP, et al. Quantitative assessment of  
704 structural image quality. *Neuroimage.* 2018;169:407-18.
- 705 64. Morgan SE, Seidlitz J, Whitaker KJ, Romero-Garcia R, Clifton NE, Scarpazza C, et al. Cortical  
706 patterning of abnormal morphometric similarity in psychosis is associated with brain expression of  
707 schizophrenia-related genes. *Proc Natl Acad Sci U S A.* 2019;116(19):9604-9.



- 708 65. Kaufmann T, van der Meer D, Doan NT, Schwarz E, Lund MJ, Agartz I, et al. Common brain  
709 disorders are associated with heritable patterns of apparent aging of the brain. *Nat Neurosci*.  
710 2019;22(10):1617-23.
- 711 66. Schaer M, Cuadra MB, Schmansky N, Fischl B, Thiran JP, Eliez S. How to measure cortical folding  
712 from MR images: a step-by-step tutorial to compute local gyrification index. *J Vis Exp*. 2012(59):e3417.
- 713 67. Kurth F, Thompson PM, Luders E. Investigating the differential contributions of sex and brain  
714 size to gray matter asymmetry. *Cortex*. 2018;99:235-42.
- 715 68. Sha Z, Schijven D, Carrion-Castillo A, Joliot M, Mazoyer B, Fisher SE, et al. The genetic  
716 architecture of structural left-right asymmetry of the human brain. *Nat Hum Behav*. 2021.
- 717 69. Desikan RS, Segonne F, Fischl B, Quinn BT, Dickerson BC, Blacker D, et al. An automated labeling  
718 system for subdividing the human cerebral cortex on MRI scans into gyral based regions of interest.  
719 *Neuroimage*. 2006;31(3):968-80.
- 720 70. Glasser MF, Coalson TS, Robinson EC, Hacker CD, Harwell J, Yacoub E, et al. A multi-modal  
721 parcellation of human cerebral cortex. *Nature*. 2016;536(7615):171-8.
- 722 71. Winkler AM, Ridgway GR, Douaud G, Nichols TE, Smith SM. Faster permutation inference in  
723 brain imaging. *Neuroimage*. 2016;141:502-16.
- 724 72. Winkler AM, Renaud O, Smith SM, Nichols TE. Permutation inference for canonical correlation  
725 analysis. *Neuroimage*. 2020;220:117065.
- 726 73. Dong D, Guell X, Genon S, Wang Y, Chen J, Eickhoff SB, et al. Linking Cerebellar Functional  
727 Gradients to Transdiagnostic Behavioral Dimensions of Psychopathology. *bioRxiv*. 2020.
- 728 74. Ge T, Reuter M, Winkler AM, Holmes AJ, Lee PH, Tirrell LS, et al. Multidimensional heritability  
729 analysis of neuroanatomical shape. *Nat Commun*. 2016;7:13291.
- 730 75. Madre M, Canales-Rodriguez EJ, Fuentes-Claramonte P, Alonso-Lana S, Salgado-Pineda P,  
731 Guerrero-Pedraza A, et al. Structural abnormality in schizophrenia versus bipolar disorder: A whole brain  
732 cortical thickness, surface area, volume and gyrification analyses. *Neuroimage Clin*. 2020;25:102131.
- 733 76. Wolfers T, Doan NT, Kaufmann T, Alnaes D, Moberget T, Agartz I, et al. Mapping the  
734 Heterogeneous Phenotype of Schizophrenia and Bipolar Disorder Using Normative Models. *JAMA*  
735 *Psychiatry*. 2018;75(11):1146-55.
- 736 77. Marquand AF, Rezek I, Buitelaar J, Beckmann CF. Understanding Heterogeneity in Clinical  
737 Cohorts Using Normative Models: Beyond Case-Control Studies. *Biol Psychiatry*. 2016;80(7):552-61.
- 738 78. Segal A, Parkes L, Aquino K, Kia SM, Wolfers T, Franke B, et al. Regional, circuit, and network  
739 heterogeneity of brain abnormalities in psychiatric disorders. *medRxiv*. 2022.
- 740 79. Voineskos AN, Jacobs GR, Ameis SH. Neuroimaging Heterogeneity in Psychosis: Neurobiological  
741 Underpinnings and Opportunities for Prognostic and Therapeutic Innovation. *Biol Psychiatry*.  
742 2020;88(1):95-102.
- 743 80. Damme KSF, Gupta T, Nusslock R, Bernard JA, Orr JM, Mittal VA. Cortical Morphometry in the  
744 Psychosis Risk Period: A Comprehensive Perspective of Surface Features. *Biol Psychiatry Cogn Neurosci*  
745 *Neuroimaging*. 2019;4(5):434-43.
- 746 81. Nanda P, Tandon N, Mathew IT, Giakoumatos CI, Abhishekh HA, Clementz BA, et al. Local  
747 gyrification index in probands with psychotic disorders and their first-degree relatives. *Biol Psychiatry*.  
748 2014;76(6):447-55.
- 749 82. Nelson EA, Kraguljac NV, White DM, Jindal RD, Shin AL, Lahti AC. A Prospective Longitudinal  
750 Investigation of Cortical Thickness and Gyrification in Schizophrenia. *Can J Psychiatry*. 2020;65(6):381-  
751 91.
- 752 83. Matsuda Y, Ohi K. Cortical gyrification in schizophrenia: current perspectives. *Neuropsychiatr Dis*  
753 *Treat*. 2018;14:1861-9.

- 754 84. Sasabayashi D, Takayanagi Y, Nishiyama S, Takahashi T, Furuichi A, Kido M, et al. Increased  
755 Frontal Gyrfication Negatively Correlates with Executive Function in Patients with First-Episode  
756 Schizophrenia. *Cereb Cortex*. 2017;27(4):2686-94.
- 757 85. Sasabayashi D, Y. T, T. T, Nemoto K, Furuichi A, Kido M, et al. Increased brain gyrfication in the  
758 schizophrenia spectrum. *Psychiatry and Clinical Neurosciences*. 2020;74:70–6.
- 759 86. Owen MJ, Sawa A, Mortensen PB. Schizophrenia. *The Lancet*. 2016;388(10039):86-97.
- 760 87. Stephan-Otto C, Lombardini F, Nunez C, Senior C, Ochoa S, Usall J, et al. Fluctuating asymmetry  
761 in patients with schizophrenia is related to hallucinations and thought disorganisation. *Psychiatry Res*.  
762 2020;285:112816.
- 763 88. Russak OD, Ives L, Mittal VA, Dean DJ. Fluctuating dermatoglyphic asymmetries in youth at  
764 ultrahigh-risk for psychotic disorders. *Schizophr Res*. 2016;170(2-3):301-3.
- 765 89. Van Dongen S, Gangestad SW. Human fluctuating asymmetry in relation to health and quality: a  
766 meta-analysis. *Evolution and Human Behavior*. 2011;32(6):380-98.
- 767 90. Oertel-Knochel V, Linden DE. Cerebral asymmetry in schizophrenia. *Neuroscientist*.  
768 2011;17(5):456-67.
- 769 91. Postema MC, Hoogman M, Ambrosino S, Asherson P, Banaschewski T, Bandeira CE, et al.  
770 Analysis of structural brain asymmetries in attention-deficit/hyperactivity disorder in 39 datasets. *J Child*  
771 *Psychol Psychiatry*. 2021;62(10):1202-19.
- 772 92. Lam BY, Huang Y, Gao Y. Gray matter asymmetry in the orbitofrontal cortex in relation to  
773 psychopathic traits in adolescents. *J Psychiatr Res*. 2021;132:84-96.
- 774 93. Roe JM, Vidal-Pineiro D, Sorensen O, Brandmaier AM, Duzel S, Gonzalez HA, et al. Asymmetric  
775 thinning of the cerebral cortex across the adult lifespan is accelerated in Alzheimer's disease. *Nat*  
776 *Commun*. 2021;12(1):721.
- 777 94. Herzog NJ, Magoulas GD. Brain Asymmetry Detection and Machine Learning Classification for  
778 Diagnosis of Early Dementia. *Sensors (Basel)*. 2021;21(3).

779
